# Supplementary material for: Post‐neoadjuvant assessment of tumour budding according to ITBCC subgroups delivers stage‐ and regression‐grade independent prognostic information in intestinal‐type gastric adenocarcinoma
Source: PubMed Central journal article supplement — J Pathol Clin Res. 2022 Jun 17;8(5):448–57. doi: 10.1002/cjp2.284 (PMC9353660; doi:10.1002/cjp2.284), 2022-06-17
Supplement: CJP2-8-448-s001.pdf [file CJP2-8-448-s001.pdf]

# Post-neoadjuvant assessment of tumour budding according to ITBCC subgroups delivers stage- and regression-grade independent prognostic information in intestinal-type gastric adenocarcinoma

M Jesinghaus *et al. J Pathol Clin Res* DOI: 10.1002/cjp2.284

## Supplementary Tables S1 – S3

**Table S1.** Detailed listing of the applied chemotherapy regimens.

|                                             |          |
|---------------------------------------------|----------|
| Fluoropyrimidine + Cisplatin                | 60 (36%) |
| Fluoropyrimidine + Oxaliplatin              | 28 (17%) |
| Fluoropyrimidine + Oxaliplatin + Docetaxel  | 15 (9%)  |
| Fluoropyrimidine + Cisplatin + Paclitaxel   | 10 (6%)  |
| Fluoropyrimidine + Oxaliplatin + Epirubicin | 43 (26%) |
| Platin + Imatinib/Panitumumab/Cetuximab...  | 6 (3%)   |
| Others                                      | 5 (3%)   |
| Adjuvant therapy after the resection        | 25 (15%) |

**Table S2.** Detailed survival of the ITBCC tumour budding subgroups within the overall cohort and in specific subgroups (mean and median survival)

|                |     | <b>Overall n (%)</b> | <b>Mean overall survival (95% confidence interval)</b> | <b>Median overall survival (95 % confidence interval)</b> | <i>p-value (log-rank)</i> |
|----------------|-----|----------------------|--------------------------------------------------------|-----------------------------------------------------------|---------------------------|
| Whole cohort   | Bd1 | 49 (29.3%)           | 51.7 (46.5-56.8)                                       | not reached                                               | <b>&lt; 0.001</b>         |
|                | Bd2 | 41 (24.5%)           | 37.4 (30.3-44.5)                                       | 35.1 (16.2-53.9)                                          |                           |
|                | Bd3 | 77 (46.1%)           | 28.1 (23.2-33.1)                                       | 23.6 (15.3-31.9)                                          |                           |
|                |     |                      |                                                        |                                                           |                           |
| UICC stage 1/2 | Bd1 | 36 (44.4%)           | 54.7 (50.1-59.3)                                       | not reached                                               | <b>0.002</b>              |
|                | Bd2 | 16 (19.7%)           | 42.1 (31.3-52.9)                                       | not reached                                               |                           |
|                | Bd3 | 29 (35.8%)           | 38.4 (30.2-46.6)                                       | 35.9 (18.8-52.9)                                          |                           |
|                |     |                      |                                                        |                                                           |                           |
| UICC stage 3/4 | Bd1 | 13 (22.1%)           | 42.8 (29.1-56.6)                                       | not reached                                               | <b>0.003</b>              |
|                | Bd2 | 25 (26.5%)           | 34.1 (25.0-43.2)                                       | 25.5 (22.3-28.6)                                          |                           |
|                | Bd3 | 48 (51.4%)           | 21.8 (16.4-27.1)                                       | 16.8 (15.6-17.9)                                          |                           |
|                |     |                      |                                                        |                                                           |                           |
| TRG 1          | Bd1 | 11 (58%)             | 47.0 (34.5-59.5)                                       | not reached                                               | <b>***</b>                |
|                | Bd2 | 3 (15.8%)            | 40.2 (20.3-59.9)                                       | 43.1 (1.9-60.0)                                           |                           |
|                | Bd3 | 5 (26.2%)            | 39.8 (24.2-55.2)                                       | 35.9 (16.7-55.0)                                          |                           |
|                |     |                      |                                                        |                                                           |                           |
| TRG 2          | Bd1 | 16 (23.9%)           | 55.2 (48.1-60.0)                                       | not reached                                               | <b>&lt; 0.001</b>         |
|                | Bd2 | 21 (31.3%)           | 34.6 (24.9-44.2)                                       | 27.2 (22.8-31.5)                                          |                           |
|                | Bd3 | 30 (44.7%)           | 27.9 (20.7-35.1)                                       | 16.8 (14.6-18.9)                                          |                           |
|                |     |                      |                                                        |                                                           |                           |
| TRG 3          | Bd1 | 22 (27.2%)           | 51.5 (43.6-59.3)                                       | not reached                                               | <b>&lt; 0.001</b>         |
|                | Bd2 | 17 (21%)             | 41.1 (29.4-52.7)                                       | not reached                                               |                           |
|                | Bd3 | 42 (51.8%)           | 26.6 (19.5-33.7)                                       | 17.1 (5.3-28.8)                                           |                           |
|                |     |                      |                                                        |                                                           |                           |
| MSS            | Bd1 | 36( 25.2%)           | 50.2 (43.9-56.5)                                       | not reached                                               | <b>&lt; 0.001</b>         |
|                | Bd2 | 36 (25.2%)           | 38.8 (31.1-46.6)                                       | not reached                                               |                           |
|                | Bd3 | 71 (49.6%)           | 26.7 (21.6-31.6)                                       | 18.1 (9.4-26.7)                                           |                           |
|                |     |                      |                                                        |                                                           |                           |
| MSI-H          | Bd1 | 6 (50%)              | all cases censored                                     | not reached                                               | <b>***</b>                |
|                | Bd2 | 2 (16.7%)            | 14.7 (2.3-27.1)                                        | not reached                                               |                           |
|                | Bd3 | 4 (33.3%)            | 42.4 (20.7-64.1)                                       | not reached                                               |                           |
|                |     |                      |                                                        |                                                           |                           |

|                   |     |            |                  |                  |                  |
|-------------------|-----|------------|------------------|------------------|------------------|
| R0 resected cases | Bd1 | 46 (34.8%) | 52.2 (47.1-57.3) | not reached      | <b>&lt;0.001</b> |
|                   | Bd2 | 33 (25%)   | 39.9 (31.7-48.1) | not reached      |                  |
|                   | Bd3 | 53 (40.2%) | 30.2 (24.2-36.2) | 27.0 (14.2-39.7) |                  |
| R1 resected cases | Bd1 | 3 (8.7%)   | 43.9 (18.1-69.3) | not reached      | <b>***</b>       |
|                   | Bd2 | 8 (22.8%)  | 26.5 (17.0-36.0) | 25.3 (15.8-34.7) |                  |
|                   | Bd3 | 24 (68.5%) | 22.5 (14.4-30.6) | 16.8 (15.2-18.3) |                  |

\*\*\* p values not given because too few events were present for a log-rank test in these subgroups.

**Table S3.** Detailed interobserver analysis regarding the ITBCC tumour budding subgroups between two observers

|                        |            | <b>Observer 2</b> |            |            | <b>Number of cases</b> | <b>Kappa-value</b> | <b>p-value</b>   |
|------------------------|------------|-------------------|------------|------------|------------------------|--------------------|------------------|
|                        |            | <b>Bd1</b>        | <b>Bd2</b> | <b>Bd3</b> |                        |                    |                  |
| <b>Observer 1</b>      | <b>Bd1</b> | 6                 | 2          | 0          | 8                      |                    |                  |
|                        | <b>Bd2</b> | 0                 | 4          | 0          | 4                      |                    |                  |
|                        | <b>Bd3</b> | 0                 | 2          | 16         | 18                     |                    |                  |
| <b>Number of cases</b> |            | 6                 | 8          | 16         | 30                     | <b>0.77</b>        | <b>&lt;0.001</b> |
